# Supplementary material for: Identification and Expression Patterns of WOX Transcription Factors under Abiotic Stresses in Pinus massoniana
Source: MDPI journal article supplement (doi:10.3390/ijms25031627), 2024-01-28
Supplement: s1 [file s1]

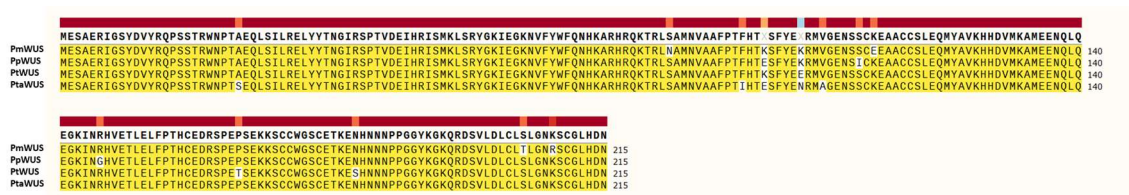

(a)

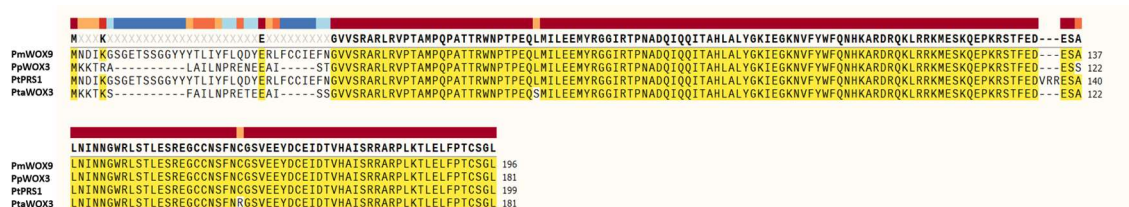

(b)

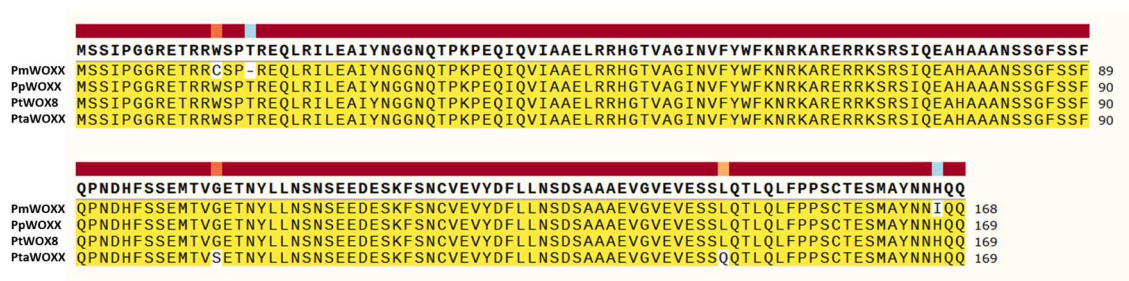

(c)

**Figure S1.** Homologous protein sequence alignments of *PmWOX9* (a) *PmWOXX* (b) and *PmWUS* (c) among *Pinus massoniana*, Pm; *Pinus pinaster*, Pp; *Pinus taeda*, Pta; *Pinus tabulaeformis*, Pt.

**Table S1** Sequences of primers

| Gene ID   | Sequences                                            |
|-----------|------------------------------------------------------|
| TUA-F     | CAAACCTTGGTCCCGTATCCTC                               |
| TUA-R     | CACAGAAAGCTGCTCATGGTAA                               |
| PmWOX1q-F | CTACCTGTGTCTGGTCAAGGATTTA                            |
| PmWOX1q-R | TCTCTTTGCACGAGCTTTACGATTT                            |
| PmWOX2q-F | GCCTTCTTCAGTGCCTACTCTGCTT                            |
| PmWOX2q-R | TTCCATTGTTATCTCCTTTATTTTT                            |
| PmWOX3q-F | GAACCACAAAGCCAGAGAAAGACAG                            |
| PmWOX3q-R | GTTAGCAAGGACGTTGAAGTGAACA                            |
| PmWOX4q-F | GTTATTGAGACAGAGTAGTGTTGCT                            |
| PmWOX4q-R | TGTATTGCTATTTTCCATAGGTTTA                            |
| PmWOX9-F  | ATGAATGATATAAAGGGATCAGGTG                            |
| PmWOX9-R  | CTATAAGCCACTGCATGTTGGAAA                             |
| PmWOXX-F  | ATGAGTTCGATTCCCGGCG                                  |
| PmWOXX-R  | TCACTGTTGATGGTTGTTATAAGCC                            |
| PmWUS-F   | ATGGAATCTGCCGAGCGAATTGGGA                            |
| PmWUS-R   | TCAGTTATCATGCAAACCACAGCT                             |
| WOX1-BD-F | <i>atggccatggaggccgaattcATGGAGCCCGAGGATGCTG</i>      |
| WOX1-BD-R | <i>ccgctgcaggtcgacgatccTCACCTCAAAAGAGTGTAGCTTTCA</i> |
| WOX2-BD-F | <i>atggccatggaggccgaattcATGCCGTCGGTCACACAGG</i>      |
| WOX2-BD-R | <i>ccgctgcaggtcgacgatccTTAAGTTCCCGATATGGATCTCC</i>   |
| WOX3-BD-F | <i>atggccatggaggccgaattcATGGAAGCCAAAATGGCAAA</i>     |
| WOX3-BD-R | <i>ccgctgcaggtcgacgatccTCATGTCATGGAATTCAAGAAGGA</i>  |
| WOX4-BD-F | <i>atggccatggaggccgaattcATGACGATGGAGATGAATTCTCCA</i> |
| WOX4-BD-R | <i>ccgctgcaggtcgacgatccTTAGGGGAATCTTTAATTGGATCA</i>  |

**Table S2** The protein sequences of *PmWOXs*

---

>PmWOX1

MEPEDAGADKNTGMDNLPHIRLPYQVMTTSQLETLRRQICVYSTICSQLVEMHKAMSQQ  
ASTSRERMLYDLPVSGQGFRPSARQRWAPSQTQLHILERLYDHGNCTPNKKKIKEITSELS  
QHGPISETNVYNWFQNRKARAKRKQQLPQKEGESEVDTDGESSREKKPKIDDEFNKED  
AGYSEKNVDAFEKRHGIFLMGSAQTEAIPQIHERSMNNIGLRHADTEAQQFEKNHGVINQ  
KTHANDQQQFNGTRENVSSLLHFQTEADLNIDTSLERTGNAAIVSTENDQGRSRVMTVL  
LDGKQFEVPVGVVDVRRTFGDTAVLLDSHGHVVPNTDSGMTFHPHGHSESYTLLR

>PmWOX2

MPSVTQGSAMANPNFVALHNNQVMTEEQMETLRRQICVYSTICSQLVEMHRAMSQQQP  
SSVPTLLMGQHMLYDLAQGNPGFRTSARQRWTPSQTQLQILESFLDQGHATPSKQKIKEI  
TMELSQHGQISETNVYNWFQNRKARAKRKQLPSQRGGESENETDDEYPGEKRFKPHDS  
NAQNPKSGHSEADPQVHKSDDVVNKPCCTDQKQFGIQENDTQSLPREDEMRRPHASLG  
STMLGVSGSAEHESVECLPEVKPIYSSVEVGNRDHDATQAYIHGSGTTTGQVDGKSWQV  
PSVVVDVRRMFGENAVLVDSRGHVMPTNDMGVSFHPQLQASEGYTVLSQYQCASGVPVH  
ALRANTGDPYRG

---

>PmWOX3

MEAKMANLNSVTNMPFACENGCCNKRFRLVPKLTLSPNSAAPMANAVWSTQQSHDQ  
YSQLQQAFFSATSGNSVSVAACCLLEPKISRLDGKVDNNSQNRNQIDRLIKGDQQNMKE  
EQAESCAVQSQAASGTRWNPTPDQIRILEMFYKGGMRTPNAEQIEHITAQLRQYKIEG  
KNVFYWFQNHKARERQKQKRNSMHQVAATAAKKTPTTIMADNPNELHKPNSNGTYSL  
YNLPFTAMSEDSRLMFTSTSLTMPCKGLAASMAQVGVDVLTATTGAKRDGLDVLKR  
SSHGPPQVQVNEEGSPSKNSMIWDSINSSGEGITNLALSQVAADMPVNAVNSCKRKNRL  
WQVMSPNEELGLHTESSSESICLQTSNSDPINPSDYTNEEDHRQLQTLQLFPLRPEGSLKSK  
GETNMDNSVLSLRVNPSSTYPFREFNKAESSTQMGAAIFEEHKYSKAAEFFPNLSADYSF  
LNSMT

---

>PmWOX4

MTMEMNSPNIIADMQGIGLRGVGSQHPLSFTMMEQVMTEEQLETLRRQISVYATICQQLV  
HMHRAVVLQMDPMPRGMLGQAIAFDSLMGMAQQRVTARQRWTPSQVQLQILEKIFDQ  
DKGTPSKQKIKEITAELSQHGHISETNVYNWFQNRRTKRKQIVTSNGESEMDNSLD  
SSKGKQVKMDETIVQETQLLRQSSVAFQGHENVPKQKDDTQQCRSAVSFSSQASSNALI  
DFAKNASFEQGFETRNGQLMDFDKPMENSNTISTGEGYIMIGNQAWLQSDPIKRF

---

>PmWOX5

WQGFMCNTNDGQLIELSNVYIRPSWAYREGIRNPTPDQINEIAGRLRTYGAIQSKSVYF  
WFQNRKTAERRQKEERVSPINQLQPHSFAGTSHRNASKDDSEGLNAGNSGERRTLELFP  
VHPTNVQEYGSHEPATSLWFTITLYIRQRILNLERDLSVKASDGLSGELRT

---

>PmWOX6

GQEGEIAQPKEKLRWIPKPEQIRILEAMFNSRIVNPPREQIKTMRARLEQFGEVHDTNVFY  
WFQNRKSKIKRRQRQPQAAQRYNSSTETGNPSSSLSMSTTSTSDQSFLDLQLVRS

---

>PmWOX7

DEEKNMPSVTAKWKPTTEQRTILEYIYRSGRLRTPKAEIEIRITVDLKKYGNVEGKNVYF  
WFQNFNARERHQRRNFTGDE

---

>PmWOX8



|          |              |
|----------|--------------|
| PpWOXA   | ANC94877     |
| PpWOXB   | ANC94878     |
| PpWOXC   | ANC94879     |
| PpWOXD   | ANC94880     |
| PpWOXE   | ANC94881     |
| PpWOXF   | ANC94882     |
| PpWOXG   | MG545154     |
| PpWOXX   | ANC94876     |
| PpWUS    | ALN42231     |
| PsWOX2   | CAT02937     |
| PsWOX3   | CAT02936     |
| PsWOX4   | CCP29681     |
| PsWUS    | CAT02938     |
| PtaWOX2  | ANC94883     |
| PtaWOX3  | ANC94884     |
| PtaWOX4  | ANC94885     |
| PtaWOX5  | ANC94886     |
| PtaWOX13 | ANC94887     |
| PtaWOXA  | ANC94889     |
| PtaWOXB  | ANC94890     |
| PtaWOXE  | ANC94891     |
| PtaWOXG  | MG545155     |
| PtaWOXX  | ANC94888     |
| PtaWUS   | ANC94892     |
| PtWOX1   | Pt2G51570    |
| PtWOX2   | Pt0G26920    |
| PtWOX3   | PtJG03550    |
| PtWOX5   | PtXG04970    |
| PtWOX6   | Pt8G58080    |
| PtWOX7   | PtQG16880    |
| PtWOX10  | Pt8G00270    |
| PtWOX12  | Pt5G40070    |
| PtPRS1   | Pt3G38920    |
| PtPRS2   | Pt3G36820    |
| PtWUS    | Pt3G38940    |
| PtPFS2   | Pt6G50390    |
| OsWOX3A  | XP_015619605 |
| OsWOX3   | BAE48302     |

|          |              |
|----------|--------------|
| OsWOX2   | NP_001044759 |
| OsWOX4   | CAJ84142     |
| OsWOX5   | NP_001044837 |
| OsWOX7   | Q0JKK6       |
| OsWOX9C  | EEE55148     |
| OsWOX9D  | NP_001174527 |
| OsWOX10  | A2YST1       |
| OsWOX11  | XP_015645719 |
| OsWOX6   | XP_015629006 |
| OsWOX13  | NP_001044631 |
| OsWUS    | BAE48303     |
| ZmNS1    | CAD60454     |
| ZmNS2    | NP_001105242 |
| ZmWOX5   | NP_001306689 |
| ZmWOX5B  | XP_008657078 |
| ZmWOX3A  | CAM32346     |
| ZmWOX3B  | CAM33396     |
| ZmWOX4   | CAM32347     |
| ZmWOX5A  | CAM32348     |
| ZmWOX9   | NP_001306687 |
| ZmWOX9A  | CAM32350     |
| ZmWOX7   | NP_001288414 |
| ZmWOX12  | NP_001288483 |
| ZmWOX11  | NP_001147238 |
| ZmWOX11A | XP_008653489 |
| ZmWOX12B | ACR38139     |
| ZmWOX13A | DAA44071     |
| ZmWOX8B  | XP_008657129 |
| ZmWOX8   | NP_001288430 |
| ZmWOX14  | ACG33593     |
| ZmWUS1   | CAJ84136     |
| ZmWUS2   | NP_001105961 |
| PtrWOX1A | XP_002317877 |
| PtrWOX1B | XP_011008807 |
| PtrWOX2  | XP_002298364 |
| PtrWOX4  | XP_011029533 |
| PtrWOX5A | XP_002312145 |
| PtrWOX5B | XP_002315173 |
| PtrWOX6  | XP_002314802 |
| PtrWOX9  | XP_002305099 |

---

|          |              |
|----------|--------------|
| PtrWOX11 | XP_002325442 |
| PtrWOX12 | XP_002319197 |
| PtrWOX13 | XP_002306432 |
| PtrWUS   | CAJ84139     |

---

|         |              |
|---------|--------------|
| AtWOX1  | AAP37133     |
| AtWOX2  | AAP37131     |
| AtWOX3  | AAP37135     |
| AtWOX4  | AAP37134     |
| AtWOX5  | AAP37136     |
| AtWOX6  | AAP37137     |
| AtWOX7  | NP_196196    |
| AtWOX8  | AAP37138     |
| AtWOX9  | AAP37139     |
| AtWOX10 | NP_173494    |
| AtWOX11 | NP_001118563 |
| AtWOX12 | AAP37141     |
| AtWOX13 | AAP37142     |
| AtWOX14 | NP_173493    |

---
